# Supplementary material for: Effective delivery of large genes to the retina by dual AAV vectors
Source: PubMed Central journal article supplement (PMC3927955; doi:10.1002/emmm.201302948), 2013-12-16
Supplement: emmm0006-0194-sd3.pdf [file emmm0006-0194-sd3.pdf]

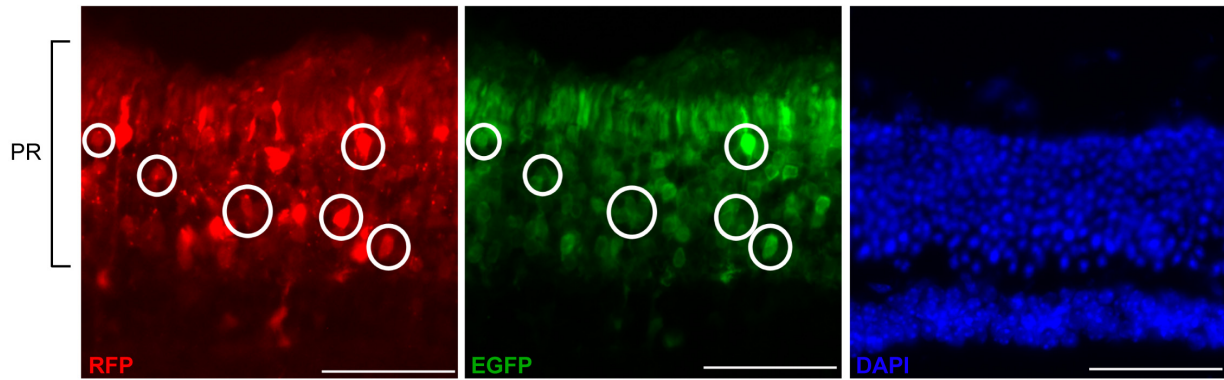

*Supporting Figure 2. Photoreceptor co-transduction following subretinal combined delivery of single AAV-EGFP and -RFP vectors.*

Fluorescence analysis of a representative retinal cryosection from C57BL/6 mice 3 weeks following subretinal co-injection of single AAV2/8-CMV-EGFP and-RFP vectors (dose of each vector/eye:  $1.4 \times 10^9$  GC, n=6 eyes) demonstrating RFP+ cells (left panel) and EGFP+ cells (central panel) is presented. The scale bar (50  $\mu$ m) is depicted in the figure. Circles highlight photoreceptors transduced by both vectors. PR: photoreceptors; RFP: native RFP fluorescence; EGFP: native EGFP fluorescence; DAPI: 4',6'-diamidino-2-phénylindole staining.
