# Supplementary material for: Effective delivery of large genes to the retina by dual AAV vectors
Source: PubMed Central journal article supplement (PMC3927955; doi:10.1002/emmm.201302948), 2013-12-16
Supplement: emmm0006-0194-sd4.pdf [file emmm0006-0194-sd4.pdf]

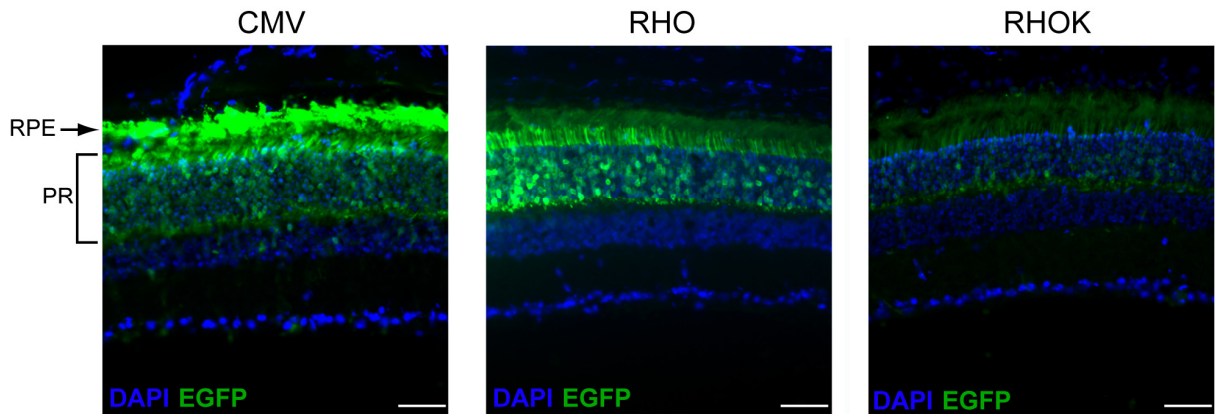

*Supporting Figure 3. CMV, RHO and RHOK promoters drive transgene expression in murine photoreceptors.*

Fluorescence analysis of representative retinal cryosections from C57BL/6 mice one month following subretinal injection of single AAV2/8 vectors encoding for EGFP under the control of the ubiquitous cytomegalovirus (CMV) promoter or the PR-specific Rhodopsin (RHO) and Rhodopsin kinase (RHOK) promoters. Arrow points at transduced RPE. The scale bar (50  $\mu$ m) is depicted in the figure. RPE: retinal pigmented epithelium; PR: photoreceptors; DAPI: 4',6'-diamidino-2-phenylindole staining; EGFP: native EGFP fluorescence.
