# Supplementary material for: Effective delivery of large genes to the retina by dual AAV vectors
Source: PubMed Central journal article supplement (PMC3927955; doi:10.1002/emmm.201302948), 2013-12-16
Supplement: emmm0006-0194-sd5.pdf [file emmm0006-0194-sd5.pdf]

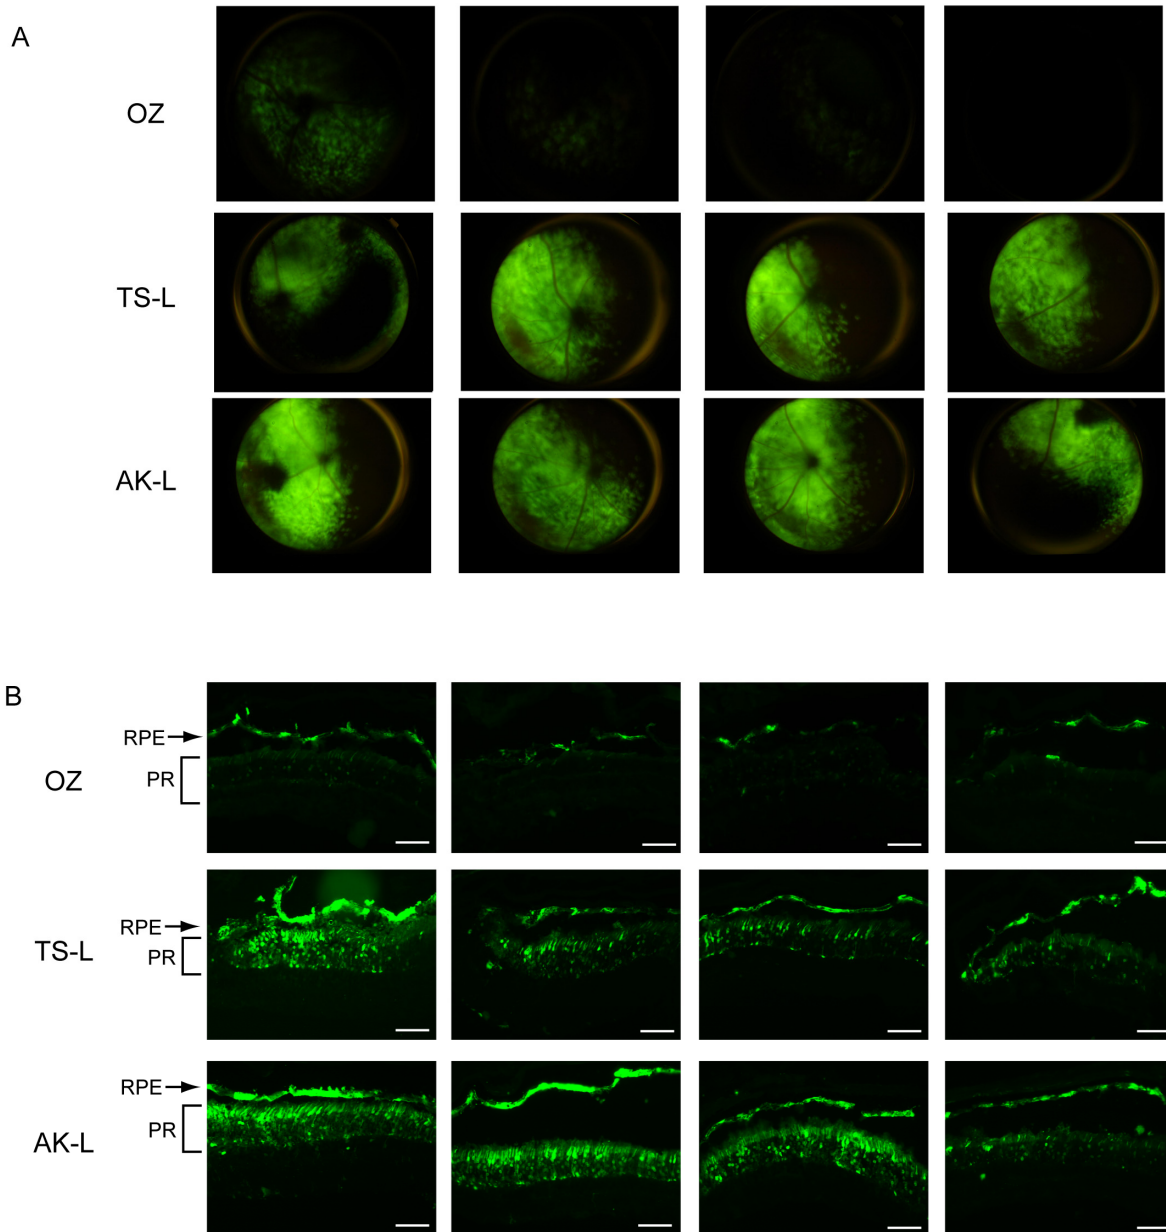

*Supporting Figure 4. Dual AAV trans-splicing and hybrid AK vectors provide the most robust transduction of RPE and photoreceptors cell layers following subretinal delivery in mice.* Live-imaging fundus fluorescence (A) and fluorescence analysis of retinal cryosections (B) from C57BL/6 mice one month following subretinal injection of AAV2/8 vectors encoding for EGFP under the control of the ubiquitous cytomegalovirus (CMV) promoter. (B) Arrows point at transduced RPE. The scale bar (200  $\mu$ m) is depicted in the figure. OZ: AAV oversized (n=4); TS-L: dual AAV trans-splicing EGFP with a combined genome size similar to OZ-EGFP (n=4); AK-L: dual AAV hybrid AK EGFP with a combined genome size similar to OZ-EGFP (n=4); RPE: retinal pigmented epithelium; PR: photoreceptors.
