# Supplementary material for: Effective delivery of large genes to the retina by dual AAV vectors
Source: PubMed Central journal article supplement (PMC3927955; doi:10.1002/emmm.201302948), 2013-12-16
Supplement: emmm0006-0194-sd17.pdf [file emmm0006-0194-sd17.pdf]

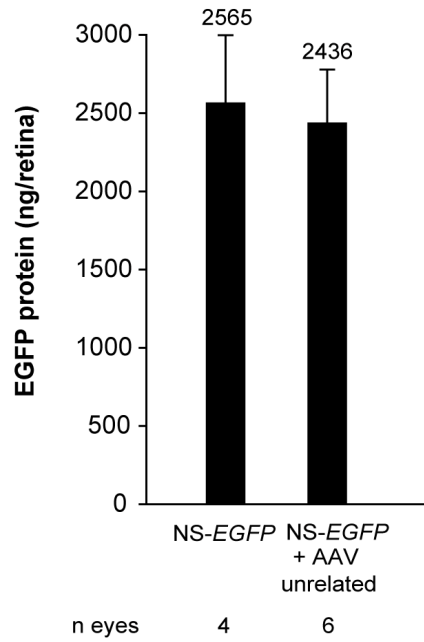

*Supporting Figure 16. Similar EGFP levels following subretinal delivery of single AAV2/8-EGFP alone or in combination with the same dose of an unrelated AAV2/8 vector.*

ELISA quantification of EGFP protein in eyecups from C57BL/6 mice one month following subretinal injection of single AAV2/8-CMV-EGFP vector of normal size (NS-EGFP) in combination or not with the same dose of a single AAV2/8 vector of normal size carrying an unrelated transgene expression cassette (unrelated AAV2/8). The number (n) of eyes analyzed is depicted below each bar. Values are represented as: mean  $\pm$  s.e.m. (standard error of the mean). No statistically significant differences were found using the Student's t-test ( $p=0.8$ ).
