# Supplementary material for: Effective delivery of large genes to the retina by dual AAV vectors
Source: PubMed Central journal article supplement (PMC3927955; doi:10.1002/emmm.201302948), 2013-12-16
Supplement: emmm0006-0194-sd18.pdf [file emmm0006-0194-sd18.pdf]

Supporting Table 1. Plasmids for AAV vector production.

|                        | Plasmid                        | Size<br>ITR- ITR (bp) | AAV serotype |     |
|------------------------|--------------------------------|-----------------------|--------------|-----|
|                        |                                |                       | 2/2          | 2/8 |
| Normal Size<br>(NS)    | pZac2.1-CMV-EGFP-SV40          | 3006                  | X            | X   |
|                        | pZac2.1-CMV-RFP-SV40           | 2653                  |              | X   |
|                        | pAAV-CMV-DsRed-HGH             | 2828                  |              | X   |
|                        | pZac2.1-RHO-EGFP-SV40          | 2900                  |              | X   |
| Oversize<br>(OZ)       | pAAV2.1-CMV-EGFP-9.9-SV40      | 9954                  | X            | X   |
|                        | pZac2.1-CMV-ABCA4_3xflag-SV40  | 8619                  | X            |     |
|                        | pAAV2.1-CBA-MYO7A_HA-BGH       | 8220                  | X            |     |
| Overlapping<br>(OV)    | pZac2.1-CMV-ABCA4_5'           | 4900                  | X            | X   |
|                        | pZac2.1-RHO-ABCA4_5'           | 4805                  |              | X   |
|                        | pZac2.1-RHOK-ABCA4_5'          | 4169                  |              | X   |
|                        | pZac2.1-VMD2-ABCA4_5'          | 4658                  |              | X   |
|                        | pAAV2.1-CBA-MYO7A_5'           | 4708                  | X            | X   |
|                        | pAAV2.1-RHO-MYO7A_5'           | 4699                  |              | X   |
|                        | pZac2.1-ABCA4_3'_3xflag_SV40   | 4740                  | X            | X   |
|                        | pAAV2.1-MYO7A_3'_HA_BGH        | 4655                  | X            | X   |
| Trans-splicing<br>(TS) | pZac2.1-CMV-ABCA4_5'TS         | 4431                  | X            |     |
|                        | pZac2.1-CMV-3xflag-ABCA4_5'TS  | 4497                  | X            | X   |
|                        | pZac2.1-RHO-ABCA4_5'TS         | 4321                  |              | X   |
|                        | pZac2.1-ABCA4_3'TS_3xflag_SV40 | 4587                  | X            | X   |
|                        | pAAV2.1-CBA-MYO7A_5'TS         | 4468                  | X            | X   |
|                        | pAAV2.1-RHO-MYO7A_5'TS         | 4459                  |              | X   |
|                        | pAAV2.1-MYO7A_3'TS_HA_BGH      | 4298                  | X            | X   |
|                        | pZac2.1-CMV-EGFP_5'TS          | 1906                  | X            | X   |
|                        | pZac2.1-CMV-EGFP_5'TS-L        | 4016                  | X            | X   |
|                        | pZac2.1-RHO-EGFP_5'TS          | 1802                  |              | X   |
|                        | pZac2.1-EGFP_3'TS_SV40-        | 1510                  | X            | X   |
|                        | pZac2.1-EGFP_3'TS_SV40-L       | 4551                  | X            | X   |

|                   | Plasmid                                 | Size<br>ITR- ITR (bp) | AAV serotype |     |
|-------------------|-----------------------------------------|-----------------------|--------------|-----|
|                   |                                         |                       | 2/2          | 2/8 |
| Hybrid AP<br>(AP) | pZac2.1-CMV- <i>ABCA4</i> _5'AP         | 4708                  | X            |     |
|                   | pZac2.1- <i>ABCA4</i> _3'AP_3xflag_SV40 | 4871                  | X            |     |
|                   | pAAV2.1-CBA- <i>MYO7A</i> _5'AP         | 4746                  | X            |     |
|                   | pAAV2.1- <i>MYO7A</i> _3'AP_HA_BGH      | 4576                  | X            |     |
| Hybrid AK<br>(AK) | pZac2.1-CMV- <i>ABCA4</i> _5'AK         | 4540                  | X            |     |
|                   | pZac2.1-CMV-3xflag- <i>ABCA4</i> _5'AK  | 4606                  | X            | X   |
|                   | pZac2.1-RHO- <i>ABCA4</i> _5'AK         | 4436                  |              | X   |
|                   | pZac2.1- <i>ABCA4</i> _3'AK_3xflag_SV40 | 4702                  | X            | X   |
|                   | pZac2.1- <i>ABCA4</i> _3'AK_HA_SV40     | 4663                  |              | X   |
|                   | pAAV2.1-CBA- <i>MYO7A</i> _5'AK         | 4577                  | X            | X   |
|                   | pAAV2.1-RHO- <i>MYO7A</i> _5'AK         | 4568                  |              | X   |
|                   | pAAV2.1- <i>MYO7A</i> _3'AK_HA_BGH      | 4421                  | X            | X   |
|                   | pZac2.1-CMV- <i>EGFP</i> _5'AK          | 2015                  | X            | X   |
|                   | pZac2.1-CMV- <i>EGFP</i> _5'AK-L        | 4125                  | X            | X   |
|                   | pZac2.1-RHO- <i>EGFP</i> _5'AK          | 1911                  |              | X   |
|                   | pZac2.1- <i>EGFP</i> _3'AK_SV40         | 1614                  | X            | X   |
|                   | pZac2.1- <i>EGFP</i> _3'AK_SV40-L       | 4660                  | X            | X   |

*N.B.* CMV: cytomegalovirus promoter; RHO: human Rhodopsin promoter; RHOK: human Rhodopsin kinase promoter; VMD2: vitelliform macular dystrophy 2 promoter; EGFP: enhanced green fluorescent protein; RFP: red fluorescent protein; DsRed: *Discosoma* sp. red fluorescent protein; *ABCA4*: human ATP-binding cassette, sub-family A, member 4; *MYO7A*: human MYOSIN VIIA; SV40: simian virus 40 poly-adenylation signal; HGH: human growth hormone poly-adenylation signal; BGH: bovine growth hormone poly-adenylation signal; 3xflag: 3xflag tag; HA: hemagglutinin tag; AP: alkaline phosphatase recombinogenic region; AK: F1 phage recombinogenic region; L: dual AAV vectors containing a combined (5'+3') large (>5 Kb in length) genome.
