# Supplementary material for: Effective delivery of large genes to the retina by dual AAV vectors
Source: PubMed Central journal article supplement (PMC3927955; doi:10.1002/emmm.201302948), 2013-12-16
Supplement: emmm0006-0194-sd20.pdf [file emmm0006-0194-sd20.pdf]

## SUPPORTING INFORMATION LIST

*Supporting Table 1. Plasmids for AAV vector production.*

*Supporting Table 2. The titers of dual AAV vectors are similar to those of regular AAV vectors of normal size.*

*Supporting Figure 1. In vitro transduction efficiency of dual AAV trans-splicing and hybrid AK vectors compared to single normal size AAV vector.*

*Supporting Figure 2. Photoreceptor co-transduction following subretinal combined delivery of single AAV-EGFP and -RFP vectors.*

*Supporting Figure 3. CMV, RHO and RHOK promoters drive transgene expression in murine photoreceptors.*

*Supporting Figure 4. Dual AAV trans-splicing and hybrid AK vectors provide the most robust transduction of RPE and photoreceptors cell layers following subretinal delivery in mice.*

*Supporting Figure 5. No detectable EGFP fluorescence in retinas injected with either the 5'- or 3'-half of dual AAV vectors.*

*Supporting Figure 6. Murine retinal transduction with various doses and ratios of dual AAV vectors.*

*Supporting Figure 7. ABCA4 proteins smaller than expected are produced in vitro by dual AAV trans-splicing and hybrid AK vectors as well as by their corresponding single 5'- and 3'-half vectors.*

*Supporting Figure 8. ABCA4 products of the expected size are detected in the eyes of C57BL/6 mice following subretinal delivery of dual AAV trans-splicing and hybrid AK vectors.*

*Supporting Figure 9. Normal retinal histology in Abca4<sup>-/-</sup> and sh1<sup>-/-</sup> mice following subretinal delivery of dual AAV trans-splicing and hybrid AK vectors.*

*Supporting Figure 10. Similar lipofuscin granules accumulation in the retina of Abca4<sup>-/-</sup> mice independently of the AAV control vector genome size.*

*Supporting Figure 11. Subretinal administration of dual AAV trans-splicing and hybrid AK vectors results in MYO7A expression in photoreceptors.*

*Supporting Figure 12. MYO7A proteins smaller than expected are produced in vitro by dual AAV trans-splicing and hybrid AK vectors as well as by their corresponding single 5'- and 3'-half vectors.*

*Supporting Figure 13. MYO7A products of the expected size are detected in the eyes of sh1<sup>-/-</sup> mice following subretinal delivery of dual AAV trans-splicing and hybrid AK vectors.*

*Supporting Figure 14. Similar rhodopsin accumulation at the connecting cilium of sh1<sup>-/-</sup> mice independently of the AAV control vector genome size.*

*Supporting Figure 15. The genome of dual AAV RHO-ABCA4 vectors is correctly packaged in AAV capsids.*

*Supporting Figure 16. Similar EGFP levels following subretinal delivery of single AAV2/8-EGFP alone or in combination with the same dose of an unrelated AAV2/8 vector.*
